# Supplementary material for: Effects of feeding on different parts of Ailanthus altissima on the intestinal microbiota of Eucryptorrhynchus scrobiculatus and Eucryptorrhynchus brandti (Coleoptera: Curculionidae)
Source: Front Microbiol. 2022 Aug 4;13:899313. doi: 10.3389/fmicb.2022.899313 (PMC9386226; doi:10.3389/fmicb.2022.899313)
Supplement: Supplementary Table 3 — Alpha diversity indexes of all samples. [file Table_3.XLSX]

## Sheet: Sheet1
Sample ID	Feature	ACE	Chao1	Simpson	Shannon	PD_whole_tree	Good’s coverage
EbA1	198	208.838	210.546	0.5767	1.7487	14.0838	0.9997
EbA2	217	226.276	233.5	0.6418	2.103	14.8874	0.9997
EbA3	217	225.397	226	0.608	2.1063	15.1129	0.9997
EbB1	211	214.825	217	0.5846	1.8057	15.1696	0.9998
EbB2	196	207.618	207.538	0.5776	1.6447	14.0269	0.9997
EbB3	212	220.246	224.214	0.5591	2.1485	15.0708	0.9997
EbC1	191	194.883	193.118	0.4884	2.0061	13.5513	0.9999
EbC2	199	201.078	200	0.6436	3.0349	14.0013	0.9999
EbC3	134	174.844	179.15	0.6821	1.9562	11.4264	0.9993
EbP1	181	203.913	211	0.4574	1.4366	13.7758	0.9995
EbP2	183	196.236	195	0.7022	2.2141	13.4522	0.9997
EbP3	209	221.289	230.429	0.6081	2.0063	14.334	0.9997
EbT1	212	223.25	219.886	0.5711	1.6339	15.0819	0.9997
EbT2	215	221.417	220.25	0.3508	1.5483	14.9244	0.9998
EbT3	215	222.81	225.929	0.4044	1.7616	14.9373	0.9998
EsA1	165	188.15	208.154	0.7829	2.5561	12.6283	0.9995
EsA2	172	190.445	191.84	0.7369	2.3718	12.9531	0.9996
EsA3	173	212.701	214.13	0.7659	2.7997	12.9878	0.9994
EsB1	189	208.245	220.5	0.7197	2.2472	13.7893	0.9995
EsB2	179	212.652	218.261	0.5995	1.8526	13.5335	0.9994
EsB3	194	212.626	219.143	0.6001	2.0167	13.893	0.9996
EsC1	187	193.926	196.562	0.7539	2.7376	13.6074	0.9998
EsC2	190	192.374	191.071	0.7898	3.0191	13.6984	0.9999
EsC3	202	209.345	212.909	0.8068	3.0072	14.1775	0.9998
EsP1	180	208.064	206.25	0.7371	2.2947	13.3381	0.9995
EsP2	180	200.963	195.536	0.89	3.6201	12.9527	0.9996
EsP3	178	203.845	194.5	0.8317	3.4274	13.0659	0.9995
EsT1	166	184.745	182.607	0.6569	2.0367	12.3195	0.9996
EsT2	180	197.178	192.6	0.6003	1.9088	13.5826	0.9996
EsT3	170	188.478	188.6	0.7216	2.242	13.0311	0.9996
